# Supplementary material for: Structure-Based Virtual Screening and De Novo Design to Identify Submicromolar Inhibitors of G2019S Mutant of Leucine-Rich Repeat Kinase 2
Source: MDPI journal article supplement (doi:10.3390/ijms232112825), 2022-10-24

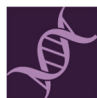

## *Supplementary Materials*

# **Structure-Based Virtual Screening and De Novo Design to Identify Submicromolar Inhibitors of G2019S mutant of Leucine-Rich Repeat Kinase 2**

*Hwangseo Park,\* Taeho Kim, Kewon Kim, Ahyoung Jang, and Sungwoo Hong\**

*Department of Bioscience and Biotechnology, Sejong University, 209 Neungdong-ro, Kwangjin-gu, Seoul 05006, Korea*

*Center for Catalytic Hydrocarbon Functionalizations, Institute for Basic Science (IBS), Daejeon 34141, Korea*

*Department of Chemistry, Korea Advanced Institute of Science and Technology (KAIST), Daejeon 34141, Korea*

Dose-response curve fits of **1-18** and **2a-2p**

Figure S1

**Figure S1.** Dose-response curve fits of **1-18** and **2a-2p**, which were used to obtain their IC<sub>50</sub> values with respect to (a) wild type and (b) G2019S mutant of LRRK2.

**(a)**

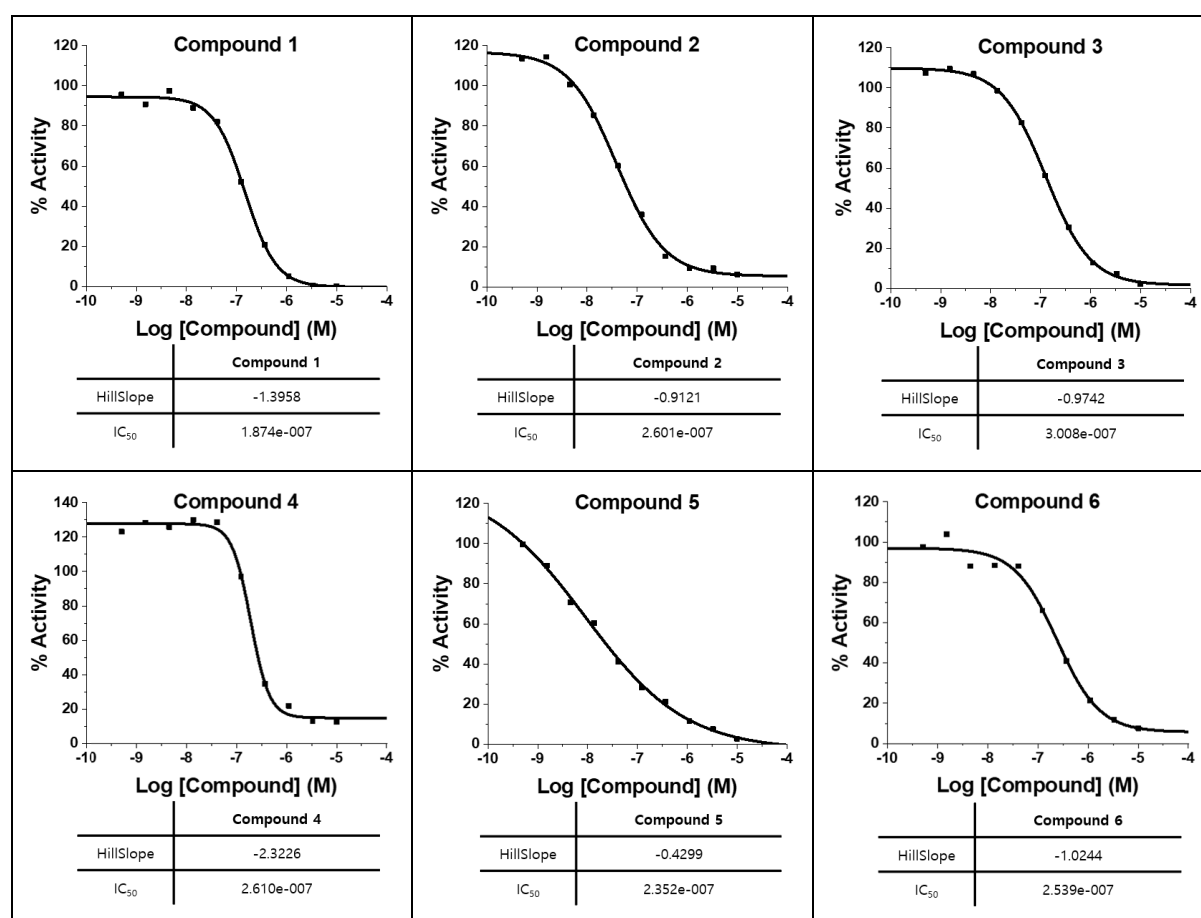

(b)

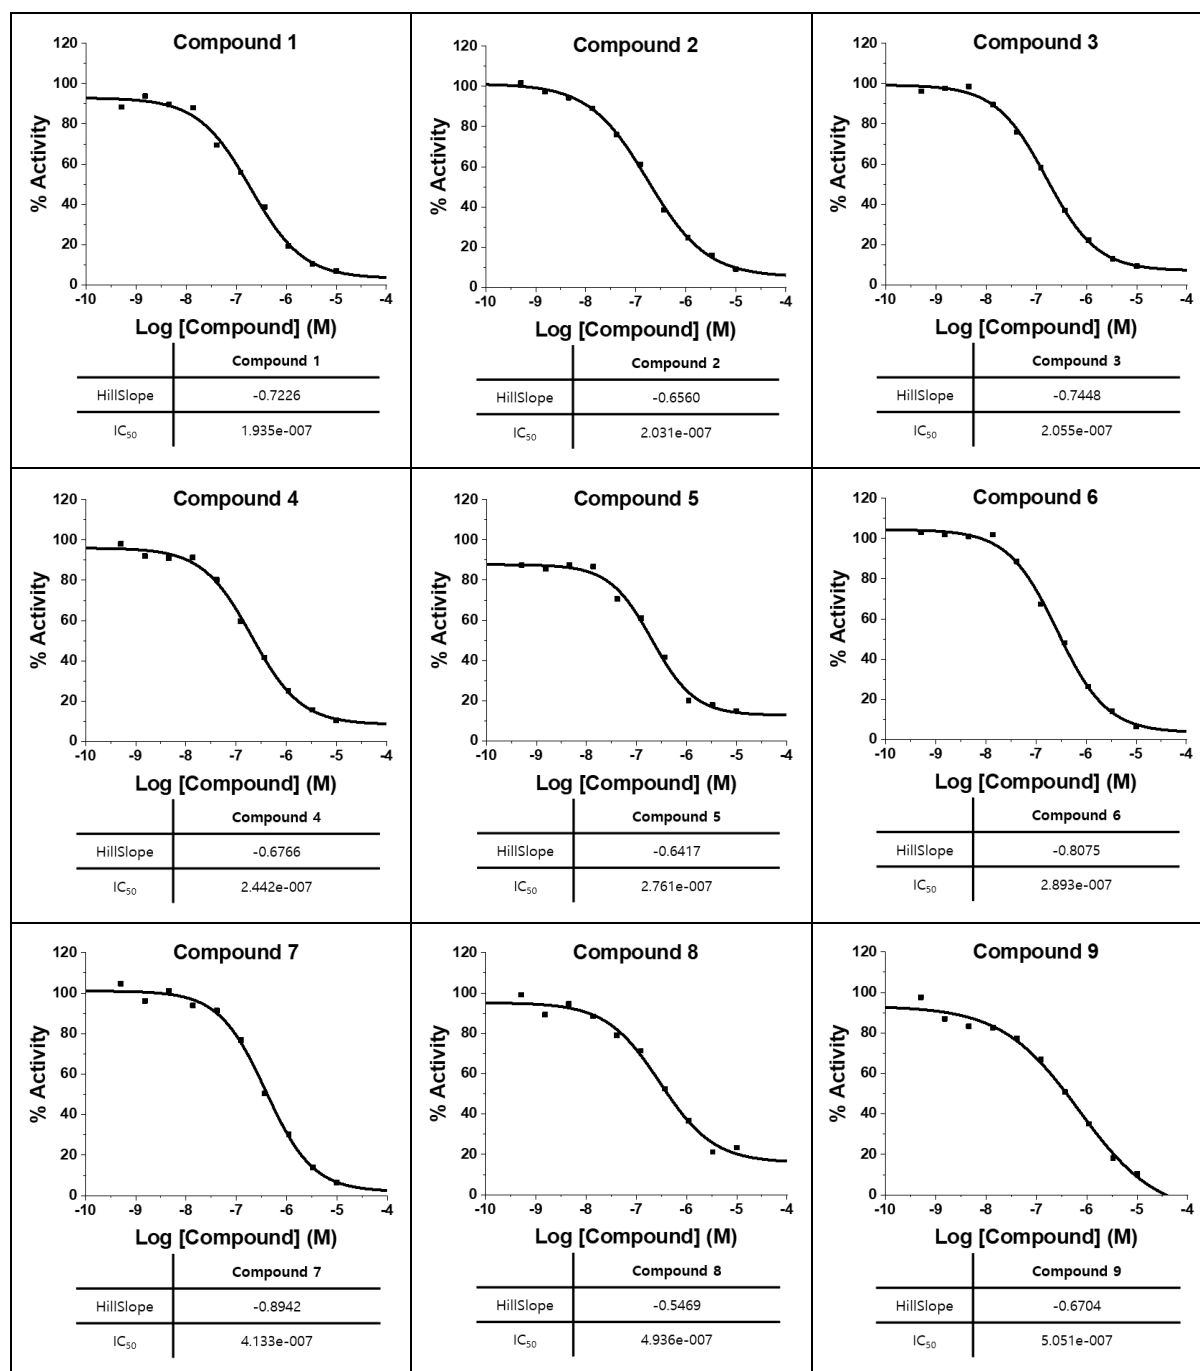

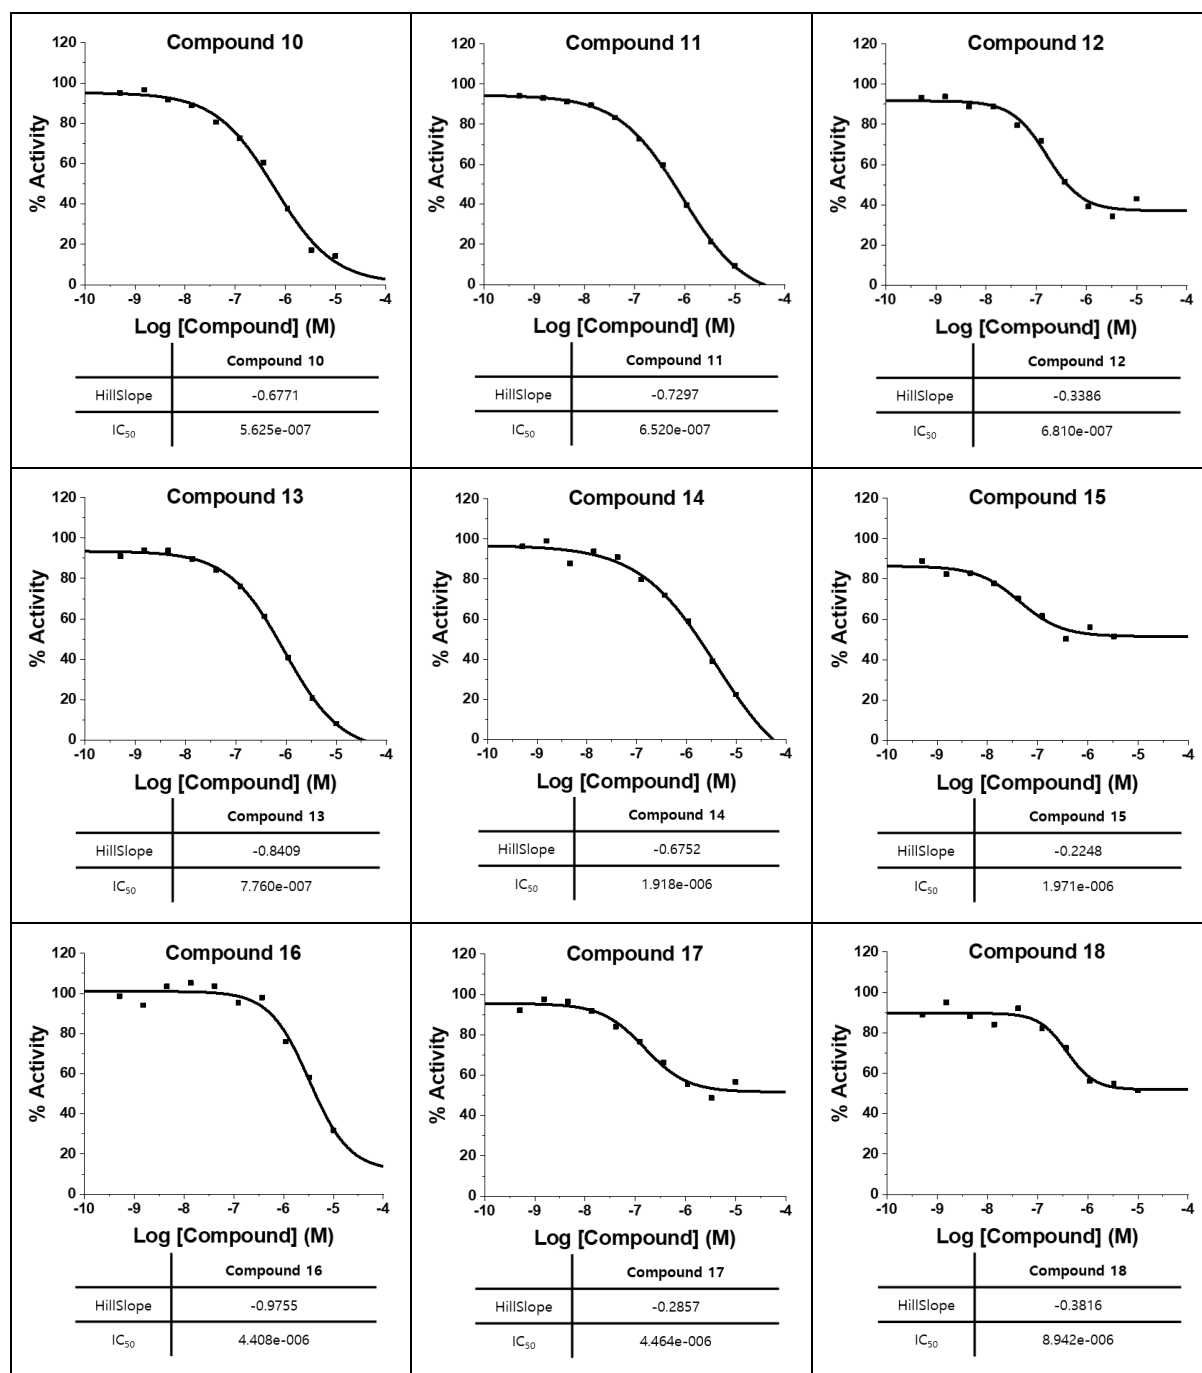

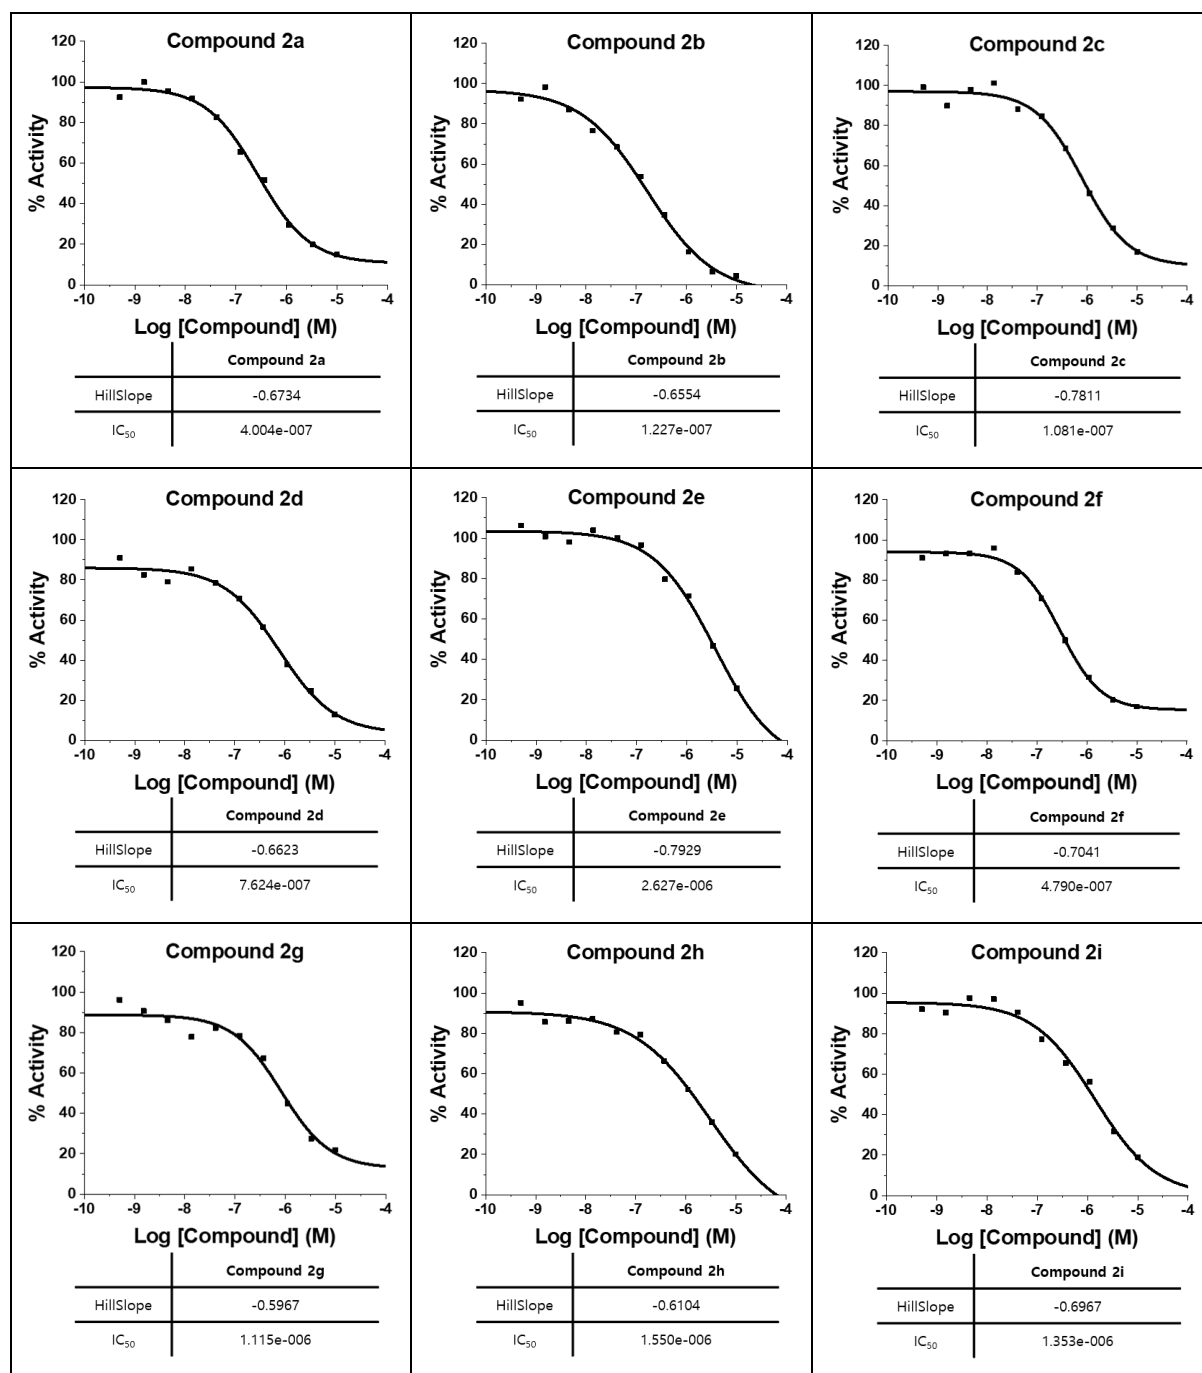

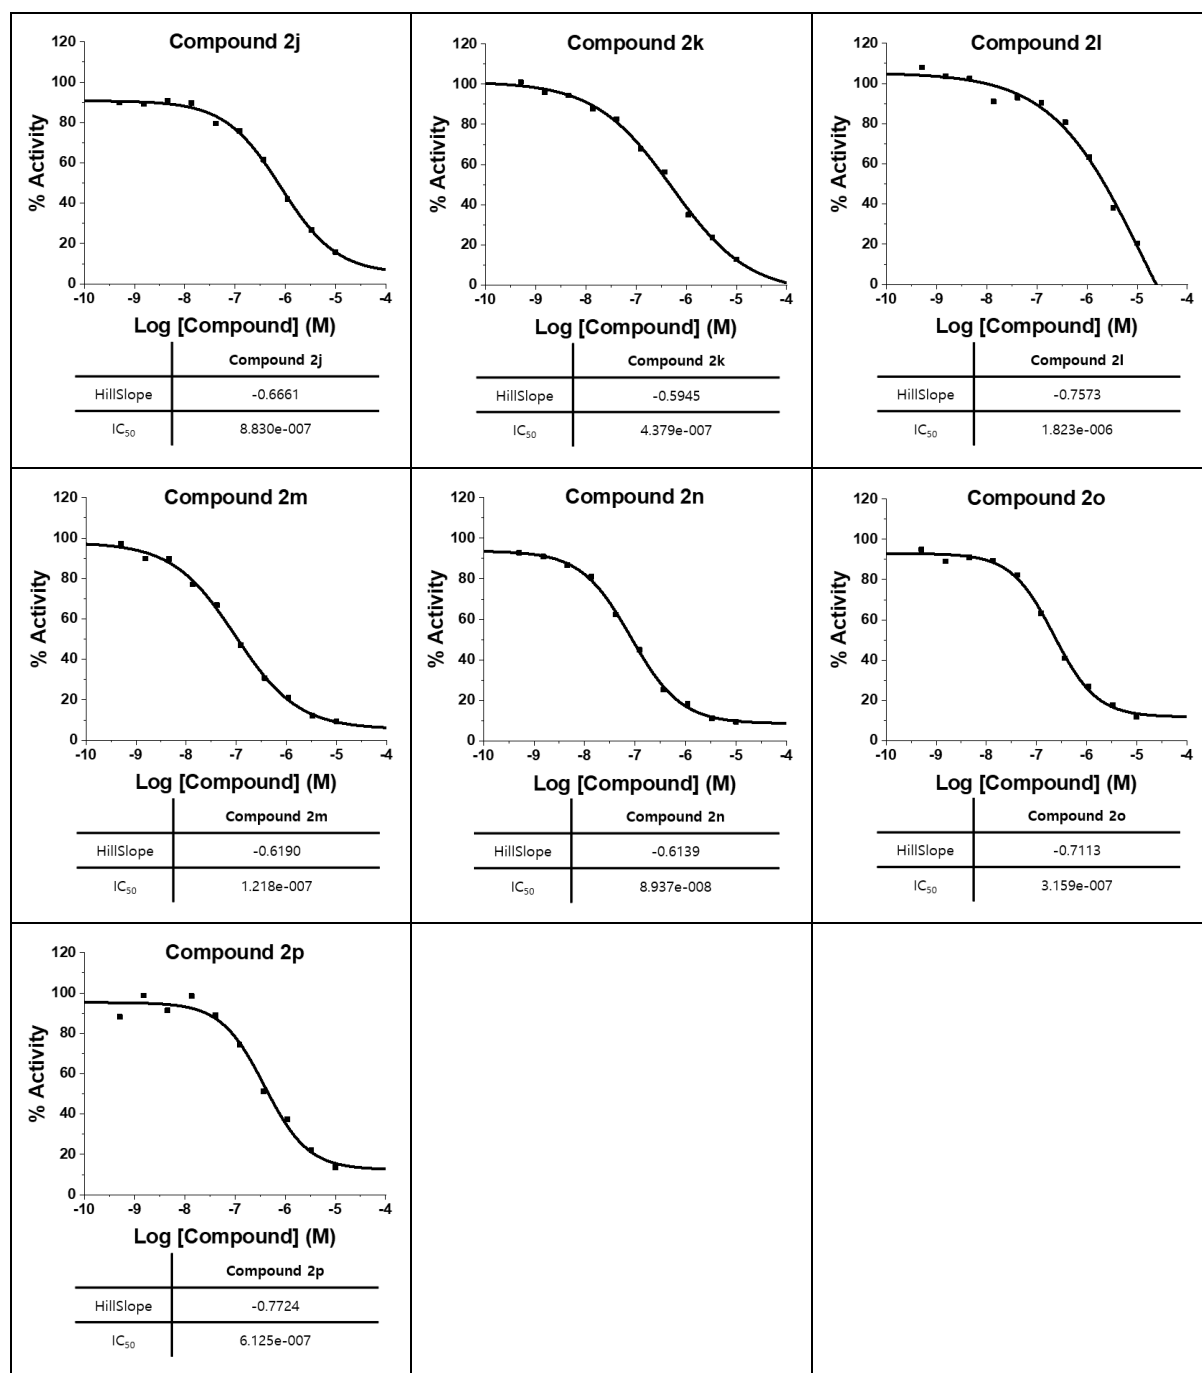

Supplement: s1 [file s1]
